# Supplementary material for: Soft-to-hard transformation of the mechanical properties of dynamic covalent polymers through component incorporation
Source: Royal Society of Chemistry journal article supplement (doi:10.1039/b612035k), 2006-11-14
Supplement: b612035k.pdf [file b612035k.pdf]

## Supplementary Information

### Soft to hard transformation of the mechanical properties of dynamic polymers through component incorporation

Takashi Ono,<sup>a,b</sup> Shunsuke Fujii,<sup>a,b</sup> Tadahito Nobori<sup>a,b</sup> and Jean-Marie Lehn<sup>\*a</sup>

<sup>a</sup> *ISIS, Université Louis Pasteur, 8 allée Gaspard Monge, F-67083 Strasbourg cedex, France.*

*E-mail: lehn@isis.u-strasbg.fr*

<sup>b</sup> *R&D Center, Mitsui Chemicals, Inc., 580-32 Nagaura, Sodegaura, Chiba, 299-0265, Japan.*

#### 1. General aspects

All reagents and solvents were purchased at the highest commercial quality and were used without further purification unless otherwise noted. <sup>1</sup>H NMR spectra were recorded on Bruker Avance 400 spectrometers. The spectra were internally referenced to the residual proton solvent signal. Microanalyses were performed by the Service de Microanalyse, Institut de Chimie, Université Louis Pasteur.

#### 2. Synthesis of monomers

##### **1,7-bis(4-ethoxycarbonylbutyl)-1,1,3,3,5,5,7,7-octamethyltetrasiloxane (M5)**

To a solution of 1,1,3,3,5,5,7,7-octamethyltetrasiloxane (5.00 g, 17.69 mmol) and Karstedt catalyst<sup>1</sup> (100ppm/Si-Hmol) in toluene (80 mL) was slowly added ethyl pent-4-enoate (5.35 g, 41.74 mmol) using a pressure-equalizing additional funnel at room temperature under Ar atmosphere, then the mixture was stirred for one night. The reaction was monitored by <sup>1</sup>H NMR analysis. After the reaction was complete, toluene and excess amount of ethyl pent-4-enoate was roughly removed by evaporation, and the residue was passed through a short silica gel column (eluent: ethyl acetate) to separate the Karstedt catalyst. The volatiles were then removed in vacuo to give the roughly purified compound **M5** (9.00g, 16.70 mmol) in 94% yield as a transparent and colorless oil. <sup>1</sup>H NMR (400 MHz, CDCl<sub>3</sub>): δ = 4.12 (q, <sup>3</sup>J = 7.0Hz, 4H), 2.29 (t, <sup>3</sup>J = 7.3Hz, 4H), 1.65 (qui, <sup>3</sup>J = 7.6Hz, 4H), 1.35 (tt, <sup>3</sup>J = 7.6Hz, <sup>3</sup>J' = 8.2Hz, 4H), 1.25 (t, <sup>3</sup>J = 7.0Hz, 6H), 0.54 (t, <sup>3</sup>J = 8.2Hz, 4H), 0.06 (s, 12H), 0.01ppm (s, 12H).

##### **1,7-bis(5-hydrazino-5-oxopentyl)-1,1,3,3,5,5,7,7-octamethyltetrasiloxane (M1)**

To a solution of **M5** (9.00 g, 16.70 mmol) in EtOH (100 mL) was added dropwise hydrazine monohydrate (8.36 g, 166.99 mmol), followed by refluxing for 2 days under Ar atmosphere. The volatiles were removed in vacuo and the residue was purified by column chromatography on silica gel (eluent: EtOH/dichloromethane, 1:4) to give the desired compound **M1** in 59% yield as a transparent and colorless oil. <sup>1</sup>H NMR (400 MHz, CDCl<sub>3</sub>): δ = 7.15 (br, 2H), 3.92 (br, 4H), 2.16 (t, <sup>3</sup>J = 7.8Hz, 4H), 1.66 (qui, <sup>3</sup>J = 7.4Hz, 4H), 1.35 (tt, <sup>3</sup>J = 7.4Hz, <sup>3</sup>J' = 8.2Hz, 4H), 0.54 (t, <sup>3</sup>J = 8.2Hz, 4H), 0.06 (s, 12H), 0.02ppm (s, 12H); elemental analysis calcd (%) for C<sub>18</sub>H<sub>46</sub> N<sub>4</sub>O<sub>5</sub>Si<sub>4</sub>: C 42.31, H 9.07, N 10.97; found: C 41.71, H 9.33, N 10.64.

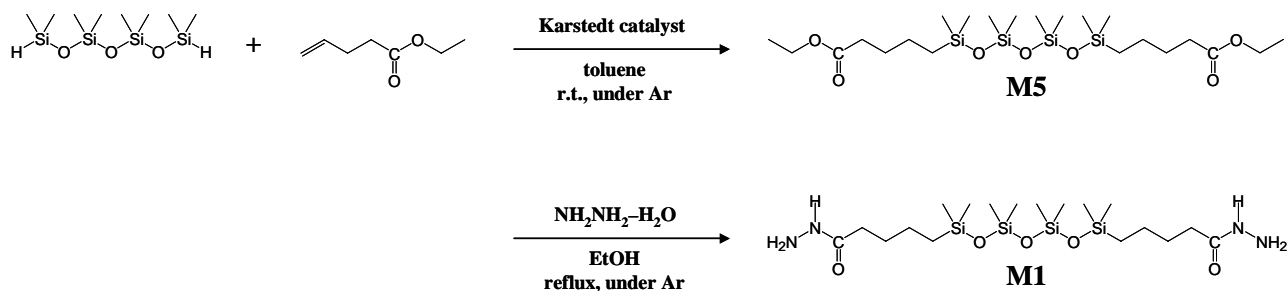

#### ***tert*-butyl-2,5-bis(methoxycarbonylmethoxy)benzene (M6)**

*tert*-butylhydroquinone (19.93 g, 120 mmol) and methyl bromoacetate (26 mL, 275 mmol) were added to a suspension of  $\text{K}_2\text{CO}_3$  (44.3 g, 321 mmol) in acetone (150 mL) and the stirred mixture was heated to reflux for 12 h under Ar atmosphere. The mixture was taken up in  $\text{H}_2\text{O}$  (200 mL) /  $\text{CHCl}_3$  (300 mL). The organic layer was washed with  $\text{H}_2\text{O}$  (200 mL) 4 times, dried over  $\text{Na}_2\text{SO}_4$  and the solvents were evaporated to dryness. The crude product was roughly purified by column chromatography on silica gel (eluent:  $\text{CH}_2\text{Cl}_2$ ) affording roughly purified **M6** (26.1 g, 84 mmol) in 70% yield as a light orange oil.  $^1\text{H}$  NMR (400 MHz,  $\text{CDCl}_3$ ):  $\delta$  = 6.97 (d,  $^3J$  = 2.4 Hz, 1H), 6.59–6.65 (m, 2H), 4.60 (s, 2H), 4.58 (s, 2H), 3.81 (s, 6H), 1.39 ppm (s, 9H).

#### ***tert*-butyl-2,5-bis(2-hydrazino-2-oxoethoxy)benzene (M2)**

**M6** (11.05 g, 35.6 mmol) in MeOH (40 mL) was added dropwise into a stirred mixture of hydrazine monohydrate (57.4 g, 1.15 mol) in MeOH (100 mL) at room temperature. The mixture was stirred for 1 h under Ar atmosphere, then the MeOH was removed in vacuo giving a two phases solution. The upper phase of the solution was roughly purified by column chromatography on silica gel (eluent:  $\text{CHCl}_3/\text{MeOH}$ , 10:1) to give crude **M2** as a viscous oil. The crude **M2** was recrystallized from mixture of  $\text{CHCl}_3$  and *n*-hexane, followed by purification of column chromatography on silica gel (eluent:  $\text{CHCl}_3/\text{MeOH}$ , 10:1) affording the desired compound **M2** (7.08 g, 22.8 mmol) in 64 % yield.  $^1\text{H}$  NMR (400 MHz,  $\text{CDCl}_3$ ):  $\delta$  = 7.98 (br, 1H), 7.74 (br, 1H), 6.89 (d,  $^3J$  = 2.9 Hz, 1H), 6.70 (d,  $^3J$  = 8.8 Hz, 1H), 6.69 (dd,  $^3J$  = 8.8 Hz,  $^3J$  = 2.9 Hz, 1H), 4.52 (s, 2H), 4.47 (s, 2H), 3.96 (br, 4H), 1.35 ppm (s, 9H); elemental analysis calcd (%) for  $\text{C}_{28}\text{H}_{46}\text{N}_8\text{O}_9$ : C 52.65, H 7.26, N 17.54; found: C 52.38, H 7.05, N 17.81.

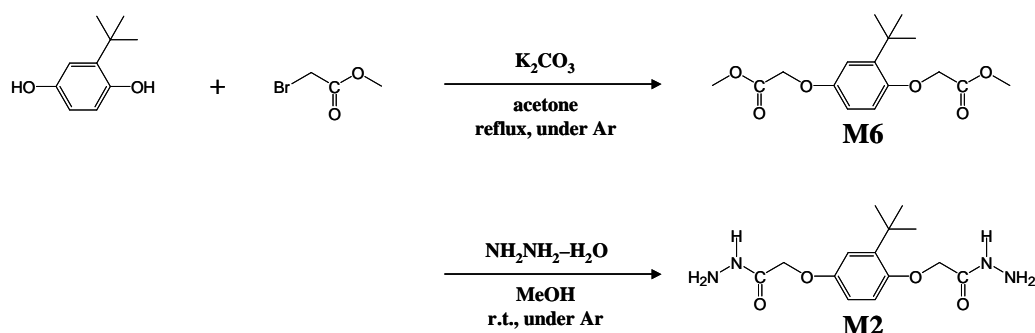

#### **1,5-bis(3-(4-formylphenoxy)propyl)-1,1,3,3,5,5-hexamethyltrisiloxane (M3)**

To a solution of 1,1,3,3,5,5-hexamethyltrisiloxane (4.26 g, 20.43 mmol) and Karstedt catalyst<sup>1</sup> (100ppm/Si-Hmol) in toluene (80 mL) was slowly added 4-allyloxybenzaldehyde (9.00 g, 51.08 mmol) using a pressure-equalizing additional funnel over 30 min at room temperature under Ar atmosphere, then the mixture was stirred for one night.

The reaction was monitored by  $^1\text{H}$  NMR analysis. After the reaction was complete, toluene was evaporated and the residue was subjected to column chromatography on silica gel (eluent: cyclohexane/dichloromethane, 1:3) to give desired compound **M3** (4.51 g, 8.46 mmol) in 41% yield as a pale yellow oil.  $^1\text{H}$  NMR (400 MHz,  $\text{CDCl}_3$ ):  $\delta$  = 9.87 (s, 2H), 7.82 (d,  $^3J$  = 8.8 Hz, 4H), 6.98 (d,  $^3J$  = 8.8 Hz, 4H), 3.99 (t,  $^3J$  = 6.7 Hz, 4H), 1.89-1.81 (tt,  $^3J$  = 6.8 Hz,  $^3J'$  = 8.8 Hz, 4H), 0.69 (t,  $^3J$  = 8.8 Hz,  $^2J$  = 3.2 Hz, 4H), 0.12 (s, 12H), 0.05 ppm (s, 6H); elemental analysis calcd (%) for  $\text{C}_{26}\text{H}_{40}\text{O}_6\text{Si}_3$ : C 58.61, H 7.57; found: C 58.46, H 7.93.

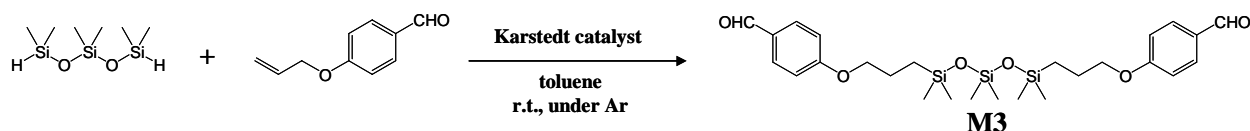

#### bis(2-(4-formyl-3-methoxyphenoxy)ethyl)ether (**M4**)

4-hydroxy-2-methoxybenzaldehyde (2.33 g, 15.3 mmol) and 2-chloroethoxyether (1.05 g, 7.3 mmol) were added to a suspension of  $\text{K}_2\text{CO}_3$  (5.19 g, 37.6 mmol) and NaI (3.07 g, 20.5 mmol) in DMF (20 mL) and the stirred mixture was heated to 90 °C for 17 h under argon atmosphere. The mixture was taken up in  $\text{H}_2\text{O}$  (500 mL) and extracted with  $\text{CHCl}_3$  (100 mL) 5 times. The combined organic layer (about 500 mL) was washed with  $\text{H}_2\text{O}$  (100 mL) twice, dried over  $\text{Na}_2\text{SO}_4$  and the solvents were evaporated to dryness to give a slightly orange powder (2.52 g). The powder was recrystallized from mixture of  $\text{CHCl}_3$  and acetone to give the desired compound **M4** (1.91 g, 5.1 mmol) in 70 % yield as a white powder.  $^1\text{H}$  NMR (400 MHz,  $[\text{D}_6]\text{DMSO}$ ):  $\delta$  = 10.16 (s, 2H), 7.66 (d,  $^3J$  = 8.8 Hz, 2H), 6.69 (d,  $^3J$  = 2.4 Hz, 2H), 6.67 (dd,  $J$  = 8.8 Hz,  $J'$  = 2.4 Hz, 2H), 4.27 (t,  $^3J$  = 4.4 Hz, 4H), 3.88 (s, 6H), 3.86 (t,  $^3J$  = 4.4 Hz, 4H); elemental analysis calcd (%) for  $\text{C}_{20}\text{H}_{22}\text{O}_7$ : C 64.16, H 5.92; found: C 63.97, H 5.76.

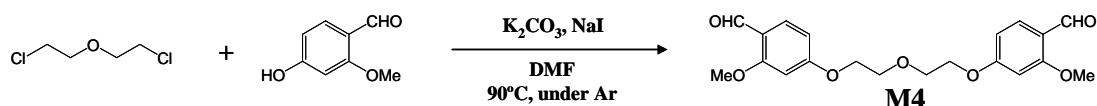

### 3. References

- 1) The catalyst referred to as Karstedt catalyst is bis(divinyltetramethyldisiloxane) platinum(0) in xylene purchased from Gelest inc. (a) Karstedt, B. D., US. Patent 3,775,452,1973. (b) Ashby, B. A.; Modic, F. J. US. Patent 4,288,345, 1981. (c) Chandra, G.; Lo, P. Y.; Hitchcock, P. B.; Lappert, M. F., *Organometallics* 1987, 6, 191.
